# Supplementary material for: The Meet-in-the-Middle Principle for Cutting and Packing Problems
Source: Atypon-hosted journal article supplement (doi:10.1287/ijoc.2018.0806), 2018-11-01
Supplement: ijoc.2018.0806-sm.pdf [file ijoc.2018.0806-sm.pdf]

# *Online Supplement for* The Meet-in-the-Middle Principle for Cutting and Packing Problems

Jean-François Côté

CIRRELT, Université Laval, 2325, rue de la Terrasse, Québec, Canada G1V 0A6, jean-francois.cote@fsa.ulaval.ca

Manuel Iori

University of Modena and Reggio Emilia, via Amendola 2, 42122 Reggio Emilia, Italy, manuel.iori@unimore.it

---

## Supplementary Algorithms

As discussed in Section 2.2 of the paper, for a general cutting and packing problem the computation of the regular normal patterns  $\mathcal{B}_i$ , for any item  $i$  in the item set  $I$ , may be obtained by invoking Algorithm 1 as `NormalPatterns( $I \setminus \{i\}; W - w_i$ )`. Then, the computation of the entire set is simply obtained by letting  $\mathcal{B} = \cup_i \mathcal{B}_i$ . As described in Section 4 of the paper, the input item set  $I$  of the one-dimensional *cutting stock problem* (CSP) consists of  $m$  item types, where each type  $i$  comprises  $d_i$  items having the same width  $w_i$ . For the CSP, cutting items according to a given order (the one usually adopted is by non-increasing width) preserves optimality, and consequently the set  $\mathcal{B}$  may be replaced by a smaller, or at least equivalent, set  $\mathcal{B}'$  that considers such order, see Equation (15) of Section 4 of the paper.

The computation of  $\mathcal{B}'$  may be obtained by invoking Algorithm 4 below. A support array  $T$  is used to store all feasible item widths combinations.  $T$  is first initialized to consider only the empty bin filling. Then, in the main loop starting at step 5,  $T$  is updated by considering all item widths combinations and the set of patterns is built accordingly. Note that, for each item type  $i > 1$ , the set  $\mathcal{B}'_i$  is computed incrementally starting from the support array  $T$  obtained during the computation of the previous set  $\mathcal{B}'_{i-1}$ .

In a similar way, also the computation of the minimal set of MIM patterns for the CSP may benefit from the adopted item sorting. This can be done by using Algorithm 5 below,

which is an adaption to the CSP of Algorithm 3 of Section 3.2 of the paper. Algorithm 5 starts by computing the regular normal patterns at step 3. Then, it fills the support arrays for the left and right patterns,  $T_{left}$  and  $T_{right}$ , respectively, at steps 4-13. Note that the check on  $w_i \leq W/2$  at step 7 is used to impose that items having width larger than  $W/2$  are only packed with their lowest corner in 0 (because no larger item can be packed in the same bin and the non-increasing width order must be fulfilled). The computation of the threshold value  $t_{\min}$  for which  $\sum_{i \in I} |\mathcal{M}'_{is}|$  is a minimum is obtained by steps 14-21. Finally, set  $\mathcal{M}'$  is built at steps 22-30.

---

**Algorithm 4** BPatternsCSP( $I; W$ )
 

---

```

1: Require:  $I$ : set of sorted items,  $W$ : bin width
2:  $\mathcal{B}' \leftarrow \emptyset$ 
3:  $T \leftarrow [0 \text{ to } W]$ : an array with all entries initialized at 0
4:  $T[0] \leftarrow 1$ 
5: for  $i = 1$  to  $m$  do
6:    $\mathcal{B}'_i \leftarrow \emptyset$ 
7:   for  $p = W - w_i$  to 0 do
8:     if  $T[p] = 1$  then
9:       for  $k = 1$  to  $d_i$  do
10:        if  $p + w_i * k > W$  then break
11:         $T[p + w_i * k] \leftarrow 1$ 
12:         $\mathcal{B}'_i \leftarrow \mathcal{B}'_i \cup \{p + w_i * (k - 1)\}$ 
13:      end for
14:    end if
15:  end for
16:   $\mathcal{B}' \leftarrow \mathcal{B}' \cup \mathcal{B}'_i$ 
17: end for
18: return  $\mathcal{B}'$ 

```

---

---

**Algorithm 5** MinimalMIMSetCSP( $I; W$ )

---

```
1: Require:  $I$ : set of sorted items,  $W$ : bin width
2:  $T_{left}, T_{right} \leftarrow [0 \text{ to } W]$ : two arrays with all entries initialized at zero
3:  $\mathcal{B}' \leftarrow \text{BPatternsCSP}(I; W)$ 
4: for  $i = 1$  to  $m$  do
5:   for  $p \in \mathcal{B}'_i$  do
6:      $T_{left}[p] \leftarrow T_{left}[p] + 1$ 
7:     if  $w_i \leq W/2$  then  $T_{right}[W - w_i - p] \leftarrow T_{right}[W - w_i - p] + 1$ 
8:   end for
9: end for
10: for  $p = 1$  to  $W$  do
11:    $T_{left}[p] \leftarrow T_{left}[p] + T_{left}[p - 1]$ 
12:    $T_{right}[W - p] \leftarrow T_{right}[W - p] + T_{right}[W - (p - 1)]$ 
13: end for
14:  $t_{\min} \leftarrow 1$ 
15:  $\min \leftarrow T_{left}[0] + T_{right}[1]$ 
16: for  $p = 2$  to  $W$  do
17:   if  $T_{left}[p - 1] + T_{right}[p] < \min$  then
18:      $\min \leftarrow T_{left}[p - 1] + T_{right}[p]$ 
19:      $t_{\min} \leftarrow p$ 
20:   end if
21: end for
22:  $\mathcal{M}' \leftarrow \emptyset$ 
23: for  $i = 1$  to  $m$  do
24:    $\mathcal{M}'_i \leftarrow \emptyset$ 
25:   for  $p \in \mathcal{B}'_i$  do
26:     if  $p < t_{\min}$  then  $\mathcal{M}'_i \leftarrow \mathcal{M}'_i \cup \{p\}$ 
27:     if  $(W - w_i - p \geq t_{\min}$  and  $w_i \leq W/2)$  then  $\mathcal{M}'_i \leftarrow \mathcal{M}'_i \cup \{W - p - w_i\}$ 
28:   end for
29:    $\mathcal{M}' \leftarrow \mathcal{M}' \cup \mathcal{M}'_i$ 
30: end for
31: return  $\mathcal{M}'$ 
```

---

## Instances of the Non-Exact Two-Stage Cutting Stock Problem

Attached to this supplement, we provide the two benchmark sets of instances that were used for the computational evaluation of the MIM patterns in the context of the non-exact two-stage cutting stock problem (Section 5 of the paper). Set A was used in Macedo et al. (2010), Silva et al. (2010), and Mrad et al. (2013). Set ATP originates from Alvarez-Valdes et al. (2002) and was later used in Silva et al. (2010). The format is the same for the two sets, and each instance can be read in the following way:

- name of the instance
- width and height of the bin
- number of items
- for each item:
  - width, height, and demand of the item.

## References

- Alvarez-Valdes R, Parajón A, Tamarit J (2002) A tabu search algorithm for large-scale guillotine (un)constrained two-dimensional cutting problems. *Computers & Operations Research* 29(7):925–947.
- Macedo R, Alves C, Valério de Carvalho J (2010) Arc-flow model for the two-dimensional guillotine cutting stock problem. *Computers & Operations Research* 37(6):991–1001.
- Mrad M, Meftahi I, Haouari M (2013) A branch-and-price algorithm for the two-stage guillotine cutting stock problem. *Journal of the Operational Research Society* 64(5):629–637.
- Silva E, Alvelos F, Valério de Carvalho J (2010) An integer programming model for two- and three-stage two-dimensional cutting stock problems. *European Journal of Operational Research* 205(3):699–708.
